# Supplementary material
Source: MDPI journal article supplement (https://www.mdpi.com/2071-1050/12/16/6313)
Supplement: s1 [file s1]

## SUPPLEMENTAL TABLES

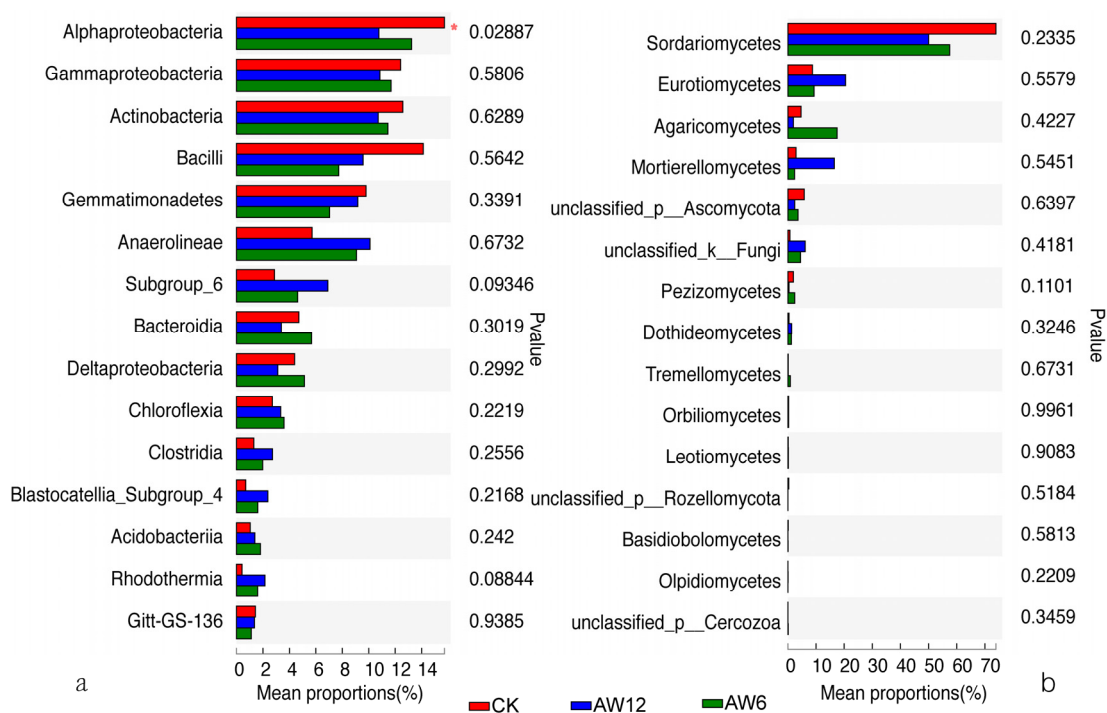

**Figure S1:** Significant analysis of relative abundance of the soil bacteria class (a), fungal class (b), histograms of the soil microbial order exposed among different treatment groups. AW6 = 6 ton/ha composted chicken manure, AW12 = 12 ton/ha composted chicken manure, CK = untreated control. AW6 and AW12 were rotated with the soil, and the drip irrigation had a 5 cm depth. The soil surface was covered with TIF for three weeks. The number of asterisks indicate a significant difference between treatments in accordance with the One-way ANOVA test. The False Discovery Rate and the Scheffer method were used for the CI calculation adjustment ( $p < 0.05$ ).
